# Supplementary material for: Expression of the Long Noncoding RNA GAS5 Correlates with Liver Fibrosis in Patients with Nonalcoholic Fatty Liver Disease
Source: PubMed Central journal article supplement (PMC7291058; doi:10.3390/genes11050545), 2020-05-13
Supplement: genes-11-00545-s001.pdf [file genes-11-00545-s001.pdf]

UCSC Genome Browser on Human Dec. 2013 (GRCh38/hg38) Assembly

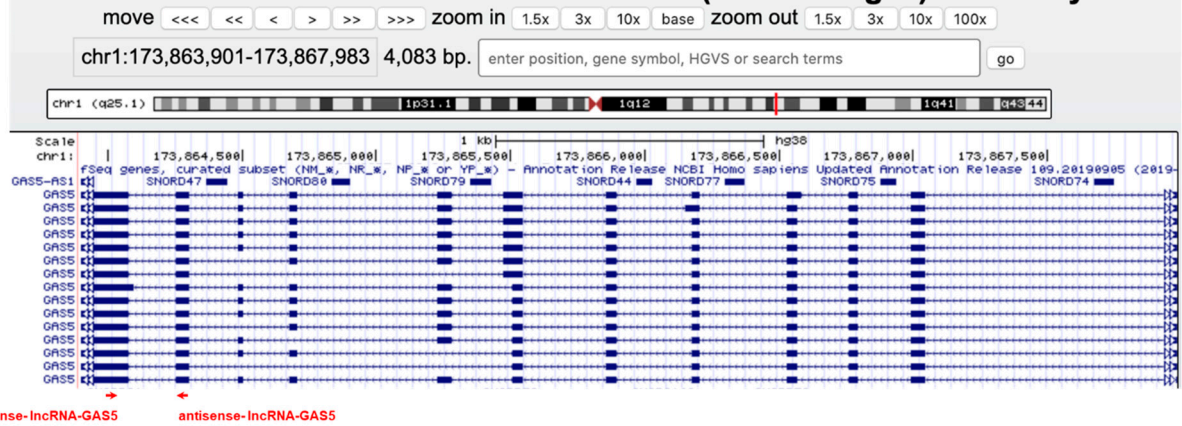

Supplementary figure1. A scheme for the Gas5 primers annealing site.
